# Supplementary material for: Cell Type Impacts Accessibility of mRNA to Silencing by RNA Interference
Source: PubMed Central journal article supplement (PMC7340969; doi:10.1016/j.omtn.2020.06.006), 2020-06-12
Supplement: mmc1.pdf [file mmc1.pdf]

**OMTN, Volume 21**

**Supplemental Information**

**Cell Type Impacts Accessibility of mRNA  
to Silencing by RNA Interference**

**Chantal M. Ferguson, Dimas Echeverria, Matthew Hassler, Socheata Ly, and Anastasia Khvorova**

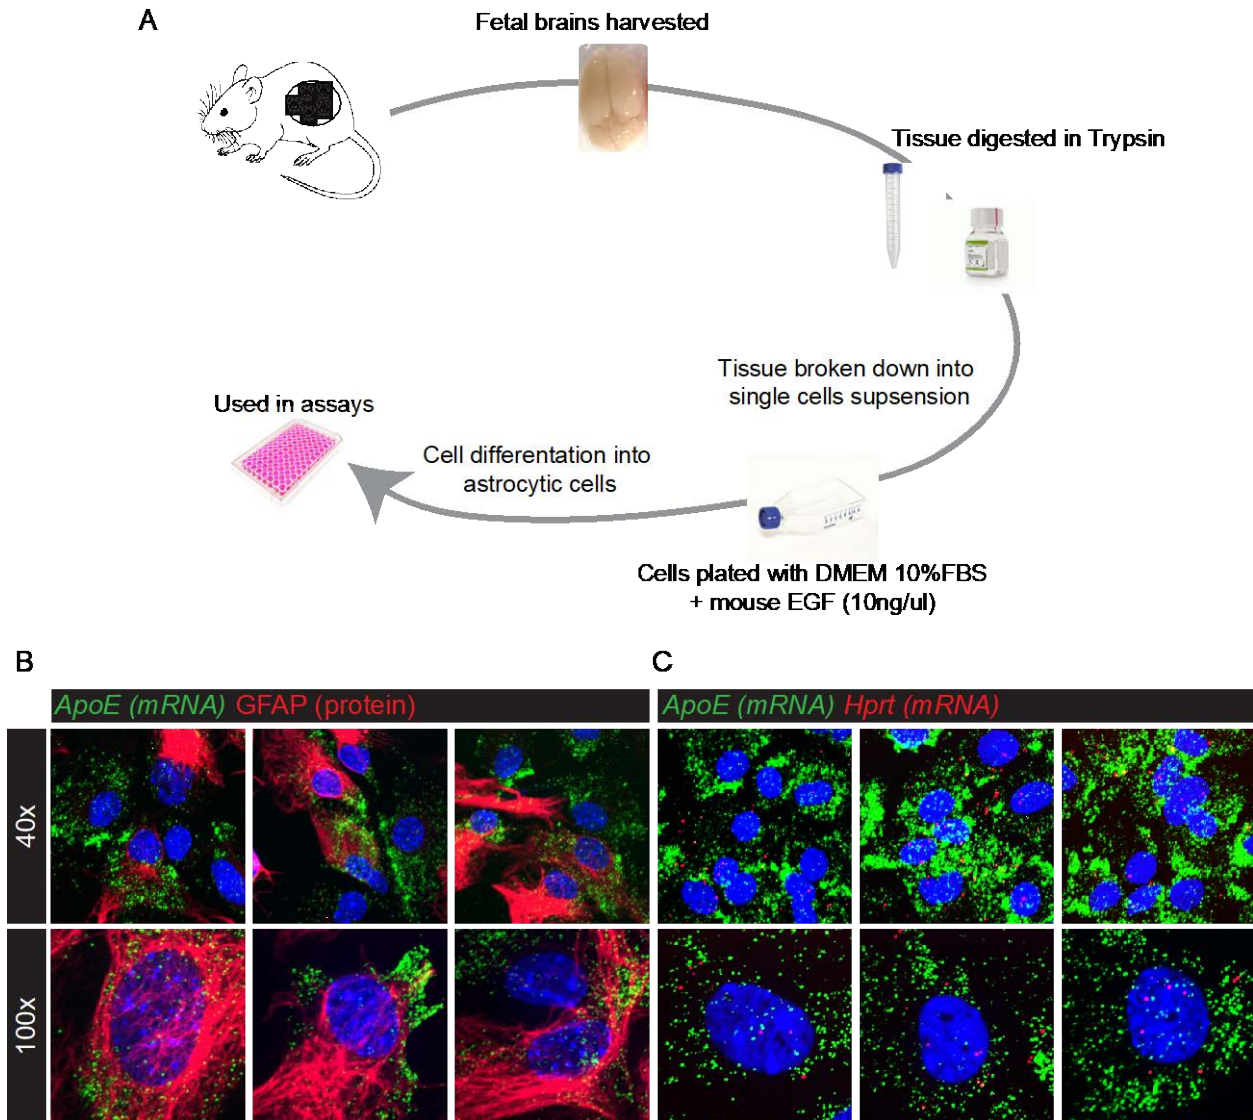

**Supplementary Figure 1: Preparation of primary mouse astrocytes.** (A) Workflow for harvest and preparation. (B) Primary mouse astrocytes co-stained for *ApoE* mRNA (green) (RNAscope) and GFAP protein (red) (IF) at 40x and 100x magnification confirming astrocyte lineage. (C) Primary mouse astrocytes co-stained for *ApoE* (green) and *HPRT* (red) mRNA (RNAscope) at 40x and 100x magnification.

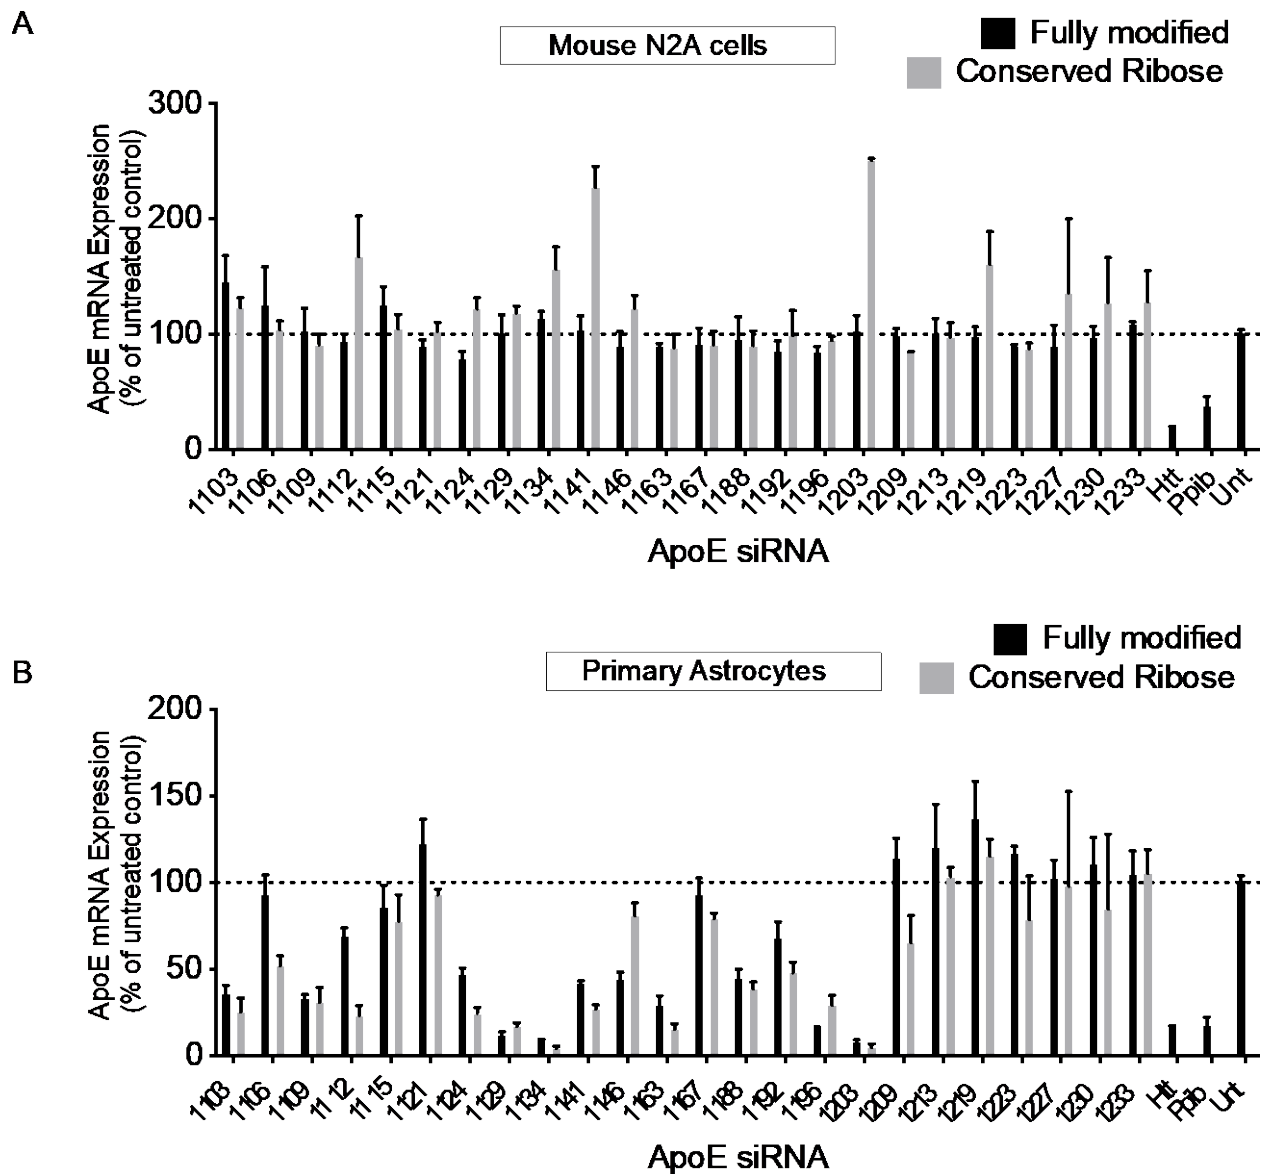

**Supplementary Figure 2: Conservation of 2'OH (Ribose) does not impact RNAi efficacy.**

(A). Screen using fully modified (black) and partially modified (grey) siRNAs targeting *ApoE* in N2A cells. (B) Screen using fully modified (black) and partially modified (grey) siRNAs targeting *ApoE* in mouse primary astrocytes. Dose: 1.5  $\mu$ M; 72 -hour timepoint; mRNA quantified using QuantiGene.

**Table 1:** siRNA sequences and chemical modifications

| Name      | Gene       | Accession Number | Anti-sense strand                                                                                           | Sense strand                                                             |
|-----------|------------|------------------|-------------------------------------------------------------------------------------------------------------|--------------------------------------------------------------------------|
| ApoE_156  | Mouse ApoE | NM_009696        | P(mU)#(fC)#(mA)(fA)(mU)(fU)(mG)(fU)(mG)(fA)(mU)(fU)(mG)#(fG)#(mC)#(fC)#(mA)#(fG)#(mU)#(fC)                  | (fG)#(mC)#(fC)(mA)(fA)(mU)(fC)(mA)(fC)(mA)(fA)(mU)(fU)#(mG)#(fA)-TegChol |
| ApoE_416  | Mouse ApoE | NM_009696        | P(mU)#(fU)#(mU)(fU)(mG)(fU)(mA)(fA)(mG)(fC)(mC)(fU)(mU)#(fU)#(mA)#(fC)#(mU)#(fU)#(mC)#(fC)                  | (fU)#(mA)#(fA)(mA)(fG)(mG)(fC)(mU)(fU)(mA)(fC)(mA)(fA)#(mA)#(fA)-TegChol |
| ApoE_636  | Mouse ApoE | NM_009696        | P(mU)#(fU)#(mC)(fA)(mA)(fG)(mC)(fG)(mC)(fU)(mU)(fG)(mC)#(fG)#(mC)#(fA)#(mU)#(fC)#(mU)#(fU)                  | (fG)#(mC)#(fG)(mC)(fA)(mA)(fG)(mC)(fG)(mC)(fU)(mU)(fG)#(mA)#(fA)-TegChol |
| ApoE_1004 | Mouse ApoE | NM_009696        | P(mU)#(fG)#(mU)(fC)(mU)(fU)(mC)(fC)(mA)(fC)(mU)(fA)(mU)#(fU)#(mG)#(fG)#(mC)#(fU)#(mC)#(fG)                  | (fC)#(mA)#(fA)(mU)(fA)(mG)(fU)(mG)(fG)(mA)(fA)(mG)(fA)#(mC)#(fA)-TegChol |
| ApoE_1032 | Mouse ApoE | NM_009696        | P(mU)#(fC)#(mC)(fA)(mU)(fC)(mA)(fG)(mG)(fU)(mU)(fU)(mG)#(fC)#(mC)#(fC)#(mA)#(fC)#(mU)#(fG)                  | (fG)#(mG)#(fC)(mA)(fA)(mA)(fC)(mC)(fU)(mG)(fA)(mU)(fG)#(mG)#(fA)-TegChol |
| ApoE_1103 | Mouse ApoE | NM_009696        | P(mU)#(fG)#(mG)(fA)(mU)(fA)(mC)(fU)(mC)(fA)(mU)(fU)(mG)#(fA)#(mU)#(fU)#(mC)#(fU)#(mC)#(fA)(mU)(fU)(mG)#(fG) | (fA)#(mU)#(fC)(mA)(fA)(mU)(fG)(mA)(fG)(mU)(fA)(mU)(fC)#(mC)#(fA)-TegChol |
| ApoE_1106 | Mouse ApoE | NM_009696        | P(mU)#(fG)#(mA)(fA)(mG)(fG)(mA)(fU)(mA)(fC)(mU)(fC)(mA)#(fU)#(mU)#(fG)#(mA)#(fU)#(mU)#(fC)                  | (fA)#(mA)#(fU)(mG)(fA)(mG)(fU)(mA)(fU)(mC)(fC)(mU)(fU)#(mC)#(fA)-TegChol |
| ApoE_1109 | Mouse ApoE | NM_009696        | P(mU)#(fG)#(mG)(fA)(mG)(fA)(mA)(fG)(mG)(fA)(mU)(fA)(mC)#(fU)#(mC)#(fA)#(mU)#(fU)#(mG)#(fA)                  | (fG)#(mA)#(fG)(mU)(fA)(mU)(fC)(mC)(fU)(mU)(fC)(mU)(fC)#(mC)#(fA)-TegChol |
| ApoE_1112 | Mouse ApoE | NM_009696        | P(mU)#(fA)#(mC)(fA)(mG)(fG)(mA)(fA)(mG)(fG)(mA)#(fU)#(mA)#(fC)#(mU)#(fC)#(mA)#(fU)                          | (fU)#(mA)#(fU)(mC)(fC)(mU)(fU)(mC)(fU)(mC)(fC)(mU)(fG)#(mU)#(fA)-TegChol |
| ApoE_1115 | Mouse ApoE | NM_009696        | P(mU)#(fA)#(mG)(fG)(mA)(fC)(mA)(fG)(mG)(fA)(mG)(fA)(mA)#(fG)#(mG)#(fA)#(mU)#(fA)#(mC)#(fU)                  | (fC)#(mC)#(fU)(mU)(fC)(mU)(fC)(mC)(fU)(mG)(fU)(mC)(fC)#(mU)#(fA)-TegChol |
| ApoE_1119 | Mouse ApoE | NM_009696        | P(mU)#(fU)#(mU)(fG)(mC)(fA)(mG)(fG)(mA)(fC)(mA)(fG)(mG)#(fA)#(mG)#(fA)#(mA)#(fG)#(mG)#(fA)                  | (fC)#(mU)#(fC)(mC)(fU)(mG)(fU)(mC)(fC)(mU)(fG)(mC)(fA)#(mA)#(fA)-TegChol |
| ApoE_1121 | Mouse ApoE | NM_009696        | P(mU)#(fU)#(mG)(fU)(mU)(fG)(mC)(fA)(mG)(fG)(mA)(fC)(mA)#(fG)#(mG)#(fA)#(mG)#(fA)#(mA)#(fG)                  | (fC)#(mC)#(fU)(mG)(fU)(mC)(fC)(mU)(fG)(mC)(fA)(mA)(fC)#(mA)#(fA)-TegChol |
| ApoE_1123 | Mouse ApoE | NM_009696        | P(mU)#(fG)#(mU)(fU)(mG)(fU)(mU)(fG)(mC)(fA)(mG)(fG)(mA)#(fC)#(mA)#(fG)#(mG)#(fA)#(mG)#(fA)                  | (fU)#(mG)#(fU)(mC)(fC)(mU)(fG)(mC)(fA)(mA)(fC)(mA)(fA)#(mC)#(fA)-TegChol |
| ApoE_1124 | Mouse ApoE | NM_009696        | P(mU)#(fU)#(mG)(fU)(mU)(fG)(mU)(fU)(mG)(fC)(mA)(fG)(mG)#(fA)#(mC)#(fA)#(mG)#(fG)#(mA)#(fG)                  | (fG)#(mU)#(fC)(mC)(fU)(mG)(fC)(mA)(fA)(mC)(fA)(mA)(fC)#(mA)#(fA)-TegChol |
| ApoE_1126 | Mouse ApoE | NM_009696        | P(mU)#(fG)#(mA)(fU)(mG)(fU)(mU)(fG)(mU)(fU)(mG)(fC)(mA)#(fG)#(mG)#(fA)#(mC)#(fA)#(mG)#(fG)                  | (fC)#(mC)#(fU)(mG)(fC)(mA)(fA)(mC)(fA)(mA)(fC)(mA)(fU)#(mC)#(fA)-TegChol |
| ApoE_1129 | Mouse ApoE | NM_009696        | P(mU)#(fA)#(mU)(fG)(mG)(fA)(mU)(fG)(mU)(fU)(mG)(fU)(mU)#(fG)#(mC)#(fA)#(mG)#(fG)#(mA)#(fC)                  | (fG)#(mC)#(fA)(mA)(fC)(mA)(fA)(mC)(fA)(mU)(fC)(mC)(fA)#(mU)#(fA)-TegChol |
| ApoE_1134 | Mouse ApoE | NM_009696        | P(mU)#(fU)#(mG)(fG)(mA)(fU)(mA)(fU)(mG)(fG)(mA)(fU)(mG)#(fU)#(mU)#(fG)#(mU)#(fU)#(mG)#(fC)                  | (fA)#(mA)#(fC)(mA)(fU)(mC)(fC)(mA)(fU)(mA)(fU)(mC)(fC)#(mA)#(fA)-TegChol |
| ApoE_1141 | Mouse ApoE | NM_009696        | P(mU)#(fA)#(mC)(fC)(mU)(fG)(mG)(fC)(mU)(fG)(mG)(fA)(mU)#(fA)#(mU)#(fG)#(mG)#(fA)#(mU)#(fG)                  | (fA)#(mU)#(fA)(mU)(fC)(mC)(fA)(mG)(fC)(mC)(fA)(mG)(fG)#(mU)#(fA)-TegChol |
| ApoE_1146 | Mouse ApoE | NM_009696        | P(mU)#(fG)#(mG)(fG)(mC)(fC)(mA)(fC)(mC)(fU)(mG)(fG)(mC)#(fU)#(mG)#(fG)#(mA)#(fU)#(mA)#(fU)                  | (fC)#(mA)#(fG)(mC)(fC)(mA)(fG)(mG)(fU)(mG)(fG)(mC)(fC)#(mC)#(fA)-TegChol |
| ApoE_1163 | Mouse ApoE | NM_009696        | P(mU)#(fG)#(mA)(fG)(mA)(fG)(mG)(fU)(mG)(fC)(mU)(fU)(mG)#(fC)#(mG)#(fA)#(mC)#(fA)#(mG)#(fG)                  | (fC)#(mU)#(fC)(mA)(fA)(mG)(fC)(mA)(fC)(mC)(fU)(mC)(fU)#(mC)#(fA)-TegChol |
| ApoE_1167 | Mouse ApoE | NM_009696        | P(mU)#(fG)#(mC)(fC)(mA)(fG)(mA)(fG)(mG)(fU)(mG)#(fC)#(mU)#(fU)#(mG)#(fA)#(mG)#(fA)                          | (fA)#(mG)#(fC)(mA)(fC)(mC)(fU)(mC)(fU)(mC)(fU)(mG)(fG)#(mC)#(fA)-TegChol |

|           |            |           |                                                                                            |                                                                          |
|-----------|------------|-----------|--------------------------------------------------------------------------------------------|--------------------------------------------------------------------------|
| Apoe_1188 | Mouse ApoE | NM_009696 | P(mU)#(fU)#(mU)(fA)(mA)(fG)(mC)(fA)(mA)(fG)(mG)(fG)(mC)#(fC)#(mA)#(fC)#(mC)#(fA)#(mG)#(fA) | (fU)#(mG)#(fG)(mC)(fC)(mC)(fU)(mU)(fG)(mC)(fU)(mU)(fA)#(mA)#(fA)-TegChol |
| Apoe_1191 | Mouse ApoE | NM_009696 | P(mU)#(fU)#(mU)(fA)(mU)(fU)(mA)(fA)(mG)(fC)(mA)(fA)(mG)#(fG)#(mG)#(fC)#(mC)#(fA)#(mC)#(fC) | (fC)#(mC)#(fC)(mU)(fU)(mG)(fC)(mU)(fU)(mA)(fA)(mU)(fA)#(mA)#(fA)-TegChol |
| Apoe_1192 | Mouse ApoE | NM_009696 | P(mU)#(fU)#(mU)(fU)(mA)(fU)(mU)(fA)(mA)(fG)(mC)(fA)(mA)#(fG)#(mG)#(fG)#(mC)#(fC)#(mA)#(fC) | (fC)#(mC)#(fU)(mU)(fG)(mC)(fU)(mU)(fA)(mA)(fU)(mA)(fA)#(mA)#(fA)-TegChol |
| Apoe_1196 | Mouse ApoE | NM_009696 | P(mU)#(fA)#(mA)(fU)(mC)(fU)(mU)(fU)(mA)(fU)(mU)(fA)(mA)#(fG)#(mC)#(fA)#(mA)#(fG)#(mG)#(fG) | (fG)#(mC)#(fU)(mU)(fA)(mA)(fU)(mA)(fA)(mA)(fG)(mA)(fU)#(mU)#(fA)-TegChol |
| Apoe_1203 | Mouse ApoE | NM_009696 | P(mU)#(fC)#(mU)(fC)(mG)(fG)(mA)(fG)(mA)(fA)(mU)(fC)(mU)#(fU)#(mU)#(fA)#(mU)#(fU)#(mA)#(fA) | (fA)#(mA)#(fA)(mG)(fA)(mU)(fU)(mC)(fU)(mC)(fC)(mG)(fA)#(mG)#(fA)-TegChol |
| Apoe_1209 | Mouse ApoE | NM_009696 | P(mU)#(fA)#(mA)(fU)(mG)(fU)(mG)(fC)(mU)(fC)(mG)(fG)(mA)#(fG)#(mA)#(fA)#(mU)#(fC)#(mU)#(fU) | (fU)#(mC)#(fU)(mC)(fC)(mG)(fA)(mG)(fC)(mA)(fC)(mA)(fU)#(mU)#(fA)-TegChol |
| Apoe_1213 | Mouse ApoE | NM_009696 | P(mU)#(fU)#(mC)(fA)(mG)(fA)(mA)(fU)(mG)(fU)(mG)(fC)(mU)#(fC)#(mG)#(fG)#(mA)#(fG)#(mA)#(fA) | (fC)#(mG)#(fA)(mG)(fC)(mA)(fC)(mA)(fU)(mU)(fC)(mU)(fG)#(mA)#(fA)-TegChol |
| Apoe_1213 | Mouse ApoE | NM_009696 | P(mU)#(fU)#(mC)(fA)(mG)(fA)(mA)(fU)(mG)(fU)(mG)(fC)(mU)#(fC)#(mG)#(fG)#(mA)#(fG)#(mA)#(fA) | (fC)#(mG)#(fA)(mG)(fC)(mA)(fC)(mA)(fU)(mU)(fC)(mU)(fG)#(mA)#(fA)-TegChol |
| Apoe_1217 | Mouse ApoE | NM_009696 | P(mU)#(fA)#(mG)(fA)(mC)(fU)(mC)(fA)(mG)(fA)(mA)(fU)(mG)#(fU)#(mG)#(fC)#(mU)#(fC)#(mG)#(fG) | (fC)#(mA)#(fC)(mA)(fU)(mU)(fC)(mU)(fG)(mA)(fG)(mU)(fC)#(mU)#(fA)-TegChol |
| Apoe_1219 | Mouse ApoE | NM_009696 | P(mU)#(fA)#(mG)(fA)(mG)(fA)(mC)(fU)(mC)(fA)(mG)(fA)(mA)#(fU)#(mG)#(fU)#(mG)#(fC)#(mU)#(fC) | (fC)#(mA)#(fU)(mU)(fC)(mU)(fG)(mA)(fG)(mU)(fC)(mU)(fC)#(mU)#(fA)-TegChol |
| Apoe_1223 | Mouse ApoE | NM_009696 | P(mU)#(fU)#(mC)(fA)(mC)(fA)(mG)(fA)(mG)(fA)(mC)(fU)(mC)#(fA)#(mG)#(fA)#(mA)#(fU)#(mG)#(fU) | (fC)#(mU)#(fG)(mA)(fG)(mU)(fC)(mU)(fC)(mU)(fG)(mU)(fG)#(mA)#(fA)-TegChol |
| Apoe_1227 | Mouse ApoE | NM_009696 | P(mU)#(fU)#(mC)(fA)(mC)(fU)(mC)(fA)(mC)(fA)(mG)(fA)(mG)#(fA)#(mC)#(fU)#(mC)#(fA)#(mG)#(fA) | (fG)#(mU)#(fC)(mU)(fC)(mU)(fG)(mU)(fG)(mA)(fG)(mU)(fG)#(mA)#(fA)-TegChol |
| Apoe_1230 | Mouse ApoE | NM_009696 | P(mU)#(fG)#(mA)(fA)(mU)(fC)(mA)(fC)(mU)(fC)(mA)(fC)(mA)#(fG)#(mA)#(fG)#(mA)#(fC)#(mU)#(fC) | (fU)#(mC)#(fU)(mG)(fU)(mG)(fA)(mG)(fU)(mG)(fA)(mU)(fU)#(mC)#(fA)-TegChol |
| Apoe_1233 | Mouse ApoE | NM_009696 | P(mU)#(fU)#(mU)(fG)(mG)(fA)(mA)(fU)(mC)(fA)(mC)(fU)(mC)#(fA)#(mC)#(fA)#(mG)#(fA)#(mG)#(fA) | (fG)#(mU)#(fG)(mA)(fG)(mU)(fG)(mA)(fU)(mU)(fC)(mC)(fA)#(mA)#(fA)-TegChol |

Detailed sequence and chemical modification patterns, of siRNAs. Chemical modifications are designated as follows, “#” –phosphorothioate bond, “m” – 2'-O-Methyl, “f” – 2'-Fluoro, “P” – 5' Phosphate.

**Table 2:** Partially modified sense strand sequences and chemical pattern

| Name      | Gene       | Accession Number | Sense strand                                                             |
|-----------|------------|------------------|--------------------------------------------------------------------------|
| Apoe_156  | Mouse ApoE | NM_009696        | (fA)#(mU)#(fC)(rA)(rA)(rU)(fG)(mA)(fG)(mU)(fA)(mU)(fC)#(mC)#(fA)-TegChol |
| Apoe_416  | Mouse ApoE | NM_009696        | (fA)#(mA)#(fU)(rG)(rA)(rG)(fU)(mA)(fU)(mC)(fC)(mU)(fU)#(mC)#(fA)-TegChol |
| Apoe_636  | Mouse ApoE | NM_009696        | (fG)#(mA)#(fG)(rU)(rA)(rU)(fC)(mC)(fU)(mU)(fC)(mU)(fC)#(mC)#(fA)-TegChol |
| Apoe_1004 | Mouse ApoE | NM_009696        | (fU)#(mA)#(fU)(rC)(rC)(rU)(fU)(mC)(fU)(mC)(fC)(mU)(fG)#(mU)#(fA)-TegChol |
| Apoe_1032 | Mouse ApoE | NM_009696        | (fC)#(mC)#(fU)(rU)(rC)(rU)(fC)(mC)(fU)(mG)(fU)(mC)(fC)#(mU)#(fA)-TegChol |
| Apoe_1103 | Mouse ApoE | NM_009696        | (fC)#(mC)#(fU)(rG)(rU)(rC)(fC)(mU)(fG)(mC)(fA)(mA)(fC)#(mA)#(fA)-TegChol |
| Apoe_1106 | Mouse ApoE | NM_009696        | (fG)#(mU)#(fC)(rC)(rU)(rG)(fC)(mA)(fA)(mC)(fA)(mA)(fC)#(mA)#(fA)-TegChol |
| Apoe_1109 | Mouse ApoE | NM_009696        | (fG)#(mC)#(fA)(rA)(rC)(rA)(fA)(mC)(fA)(mU)(fC)(mC)(fA)#(mU)#(fA)-TegChol |
| Apoe_1112 | Mouse ApoE | NM_009696        | (fA)#(mA)#(fC)(rA)(rU)(rC)(fC)(mA)(fU)(mA)(fU)(mC)(fC)#(mA)#(fA)-TegChol |
| Apoe_1115 | Mouse ApoE | NM_009696        | (fA)#(mU)#(fA)(rU)(rC)(rC)(fA)(mG)(fC)(mC)(fA)(mG)(fG)#(mU)#(fA)-TegChol |
| Apoe_1119 | Mouse ApoE | NM_009696        | (fC)#(mA)#(fG)(rC)(rC)(rA)(fG)(mG)(fU)(mG)(fG)(mC)(fC)#(mC)#(fA)-TegChol |
| Apoe_1121 | Mouse ApoE | NM_009696        | (fC)#(mU)#(fC)(rA)(rA)(rG)(fC)(mA)(fC)(mC)(fU)(mC)(fU)#(mC)#(fA)-TegChol |
| Apoe_1123 | Mouse ApoE | NM_009696        | (fA)#(mG)#(fC)(rC)(rC)(fU)(mC)(fU)(mC)(fU)(mG)(fG)#(mC)#(fA)-TegChol     |
| Apoe_1124 | Mouse ApoE | NM_009696        | (fU)#(mG)#(fG)(rC)(rC)(rC)(fU)(mU)(fG)(mC)(fU)(mU)(fA)#(mA)#(fA)-TegChol |
| Apoe_1126 | Mouse ApoE | NM_009696        | (fC)#(mC)#(fU)(rU)(rG)(rC)(fU)(mU)(fA)(mA)(fU)(mA)(fA)#(mA)#(fA)-TegChol |
| Apoe_1129 | Mouse ApoE | NM_009696        | (fG)#(mC)#(fU)(rU)(rA)(rA)(fU)(mA)(fA)(mA)(fG)(mA)(fU)#(mU)#(fA)-TegChol |
| Apoe_1134 | Mouse ApoE | NM_009696        | (fA)#(mA)#(fA)(rG)(rA)(rU)(fU)(mC)(fU)(mC)(fC)(mG)(fA)#(mG)#(fA)-TegChol |
| Apoe_1141 | Mouse ApoE | NM_009696        | (fU)#(mC)#(fU)(rC)(rC)(rG)(fA)(mG)(fC)(mA)(fC)(mA)(fU)#(mU)#(fA)-TegChol |
| Apoe_1146 | Mouse ApoE | NM_009696        | (fC)#(mC)#(fA)(rG)(rC)(rA)(fC)(mA)(fU)(mU)(fC)(mU)(fG)#(mA)#(fA)-TegChol |
| Apoe_1163 | Mouse ApoE | NM_009696        | (fC)#(mA)#(fU)(rU)(rC)(rU)(fG)(mA)(fG)(mU)(fC)(mU)(fC)#(mU)#(fA)-TegChol |
| Apoe_1167 | Mouse ApoE | NM_009696        | (fC)#(mU)#(fG)(rA)(rG)(rU)(fC)(mU)(fC)(mU)(fG)(mU)(fG)#(mA)#(fA)-TegChol |
| Apoe_1188 | Mouse ApoE | NM_009696        | (fG)#(mU)#(fC)(rU)(rC)(rU)(fG)(mU)(fG)(mA)(fG)(mU)(fG)#(mA)#(fA)-TegChol |
| Apoe_1191 | Mouse ApoE | NM_009696        | (fU)#(mC)#(fU)(rG)(rU)(rG)(fA)(mG)(fU)(mG)(fA)(mU)(fU)#(mC)#(fA)-TegChol |
| Apoe_1192 | Mouse ApoE | NM_009696        | (fG)#(mU)#(fG)(rA)(rG)(rU)(fG)(mA)(fU)(mU)(fC)(mC)(fA)#(mA)#(fA)-TegChol |
| Apoe_1196 | Mouse ApoE | NM_009696        | (fA)#(mU)#(fC)(rA)(rA)(rU)(fG)(mA)(fG)(mU)(fA)(mU)(fC)#(mC)#(fA)-TegChol |
| Apoe_1203 | Mouse ApoE | NM_009696        | (fA)#(mA)#(fU)(rG)(rA)(rG)(fU)(mA)(fU)(mC)(fC)(mU)(fU)#(mC)#(fA)-TegChol |
| Apoe_1209 | Mouse ApoE | NM_009696        | (fG)#(mA)#(fG)(rU)(rA)(rU)(fC)(mC)(fU)(mU)(fC)(mU)(fC)#(mC)#(fA)-TegChol |
| Apoe_1213 | Mouse ApoE | NM_009696        | (fU)#(mA)#(fU)(rC)(rC)(rU)(fU)(mC)(fU)(mC)(fC)(mU)(fG)#(mU)#(fA)-TegChol |
| Apoe_1213 | Mouse ApoE | NM_009696        | (fC)#(mC)#(fU)(rU)(rC)(rU)(fC)(mC)(fU)(mG)(fU)(mC)(fC)#(mU)#(fA)-TegChol |
| Apoe_1217 | Mouse ApoE | NM_009696        | (fC)#(mC)#(fU)(rG)(rU)(rC)(fC)(mU)(fG)(mC)(fA)(mA)(fC)#(mA)#(fA)-TegChol |
| Apoe_1219 | Mouse ApoE | NM_009696        | (fG)#(mU)#(fC)(rC)(rU)(rG)(fC)(mA)(fA)(mC)(fA)(mA)(fC)#(mA)#(fA)-TegChol |
| Apoe_1223 | Mouse ApoE | NM_009696        | (fG)#(mC)#(fA)(rA)(rC)(rA)(fA)(mC)(fA)(mU)(fC)(mC)(fA)#(mU)#(fA)-TegChol |
| Apoe_1227 | Mouse ApoE | NM_009696        | (fA)#(mA)#(fC)(rA)(rU)(rC)(fC)(mA)(fU)(mA)(fU)(mC)(fC)#(mA)#(fA)-TegChol |
| Apoe_1230 | Mouse ApoE | NM_009696        | (fA)#(mU)#(fA)(rU)(rC)(rC)(fA)(mG)(fC)(mC)(fA)(mG)(fG)#(mU)#(fA)-TegChol |
| Apoe_1233 | Mouse ApoE | NM_009696        | (fC)#(mA)#(fG)(rC)(rC)(rA)(fG)(mG)(fU)(mG)(fG)(mC)(fC)#(mC)#(fA)-TegChol |

Detailed sequence and chemical modification patterns, of siRNAs. Chemical modifications are designated as follows, “#” –phosphorothioate bond, “m” – 2'-O-Methyl, “f” – 2'-Fluoro, “P” – 5' Phosphate.

**Table 3: Key Resources**

| <b>Reagent</b>                     | <b>Source</b>               | <b>Identifier</b> |
|------------------------------------|-----------------------------|-------------------|
| <b>QuantiGene Probeset</b>         |                             |                   |
| Mouse ApoE                         | Thermofisher                | SB-13611          |
| Mouse PPIB                         | Thermofisher                | SB-10002          |
| <b>Antibodies</b>                  |                             |                   |
| Rabbit polyclonal anti-ApoE        | Abcam                       | 183597            |
| Rabbit polyclonal anti-beta-actin  | Cell Signaling Technologies | 4970              |
| Anti-NeuN                          | Millipore                   | MAB37             |
| Anti-GFAP                          | Abcam                       | 5441              |
| <b>RNAscope Probe sets</b>         |                             |                   |
| ApoE                               | ACDBio                      | 313271            |
| HPRT                               | ACDBio                      | 312951            |
| <b>Commerical Assays</b>           |                             |                   |
| QuantiGene 2.0                     | Thermofisher                | QS0011            |
| RNAscope Fluorescent Multiplex Kit | ACDBio                      | 320850            |
| <b>Deposited Data</b>              |                             |                   |
| N2A cells                          | GSE45119                    |                   |
| Astrocytes                         | GSE52564                    |                   |
| <b>Primers</b>                     |                             |                   |
| ApoE Forward                       | GCTCAGACCCTGGAGGCTAA        |                   |
| ApoE Reverse                       | CTGTTCCTCCAGCTCCTTTTGTGTA   |                   |
